# Supplementary material
Source: Research Square preprint supplement (doi:10.21203/rs.3.rs-9405385/v1)
Supplement: Supplementary file 1 [file 41782fb91ceb9a1695f0b8ce.docx]

**Supplementary Information**

**Role of Zinc Oxide Particle Size in Modulating Growth and Cadmium Toxicity in *Allium sativum* L.: A Comparative Study of Quantum Dots, Nanoparticles, and Bulk Forms**

**Dhivya Viswanathan, Abhrajit Debroy, R. Seenivasan**, Amitava Mukherjee***

**Centre for Nanobiotechnology, Vellore Institute of Technology, Vellore, Tamil Nadu, India**

***Corresponding Author (Lead)**

**Dr. Amitava Mukherjee**

**Senior Professor & Former Director**

**Centre for Nanobiotechnology**

**Vellore Institute of Technology, Vellore – 632014, India.**

**Email: amit.mookerjea@gmail.com, amitav@vit.ac.in**

**Phone: 91 416 220262**

**Fax: 91-416-2243**

**** Corresponding Author**

**Dr. R. Seenivasan**

**Professor**

**Centre for Nanobiotechnology**

**Vellore Institute of Technology, Vellore – 632014, India.**

**Email: rseenivasan@vit.ac.in**

**Phone: 91 416 2243118**

**Methods**

**S1:** The following chemicals were used in this study: Thiobarbituric acid (TBA), 2′,7′-dichlorofluorescein diacetate (DCFH-DA), methionine, potassium hydroxide (KOH), zinc acetate dihydrate (C4H6O4Zn.2H2O), Evans blue, and Nile red were purchased from Sigma-Aldrich, India. Acetone was procured from Merck Life Science Pvt Ltd., Glacial acetic acid (GAA), sodium chloride (NaCl), 2-deoxy-D-ribose, riboflavin, sodium hydroxide, sodium phosphate dibasic dihydrate (Na2HPO4.2H2O), sodium phosphate monobasic dihydrate (NaH2PO4.2H2O), D-glucose, phenol, riboflavin, cadmium sulphate (CdSO4.8H2O), polyvinylpyrrolidone (PVP) and lactic acid (C3H6O3) were obtained from Sisco Research Laboratories Pvt. Ltd., India. Sulfuric acid (H2SO4, 35-38% v/v), nitric acid (HNO3, 70% v/v), hydrogen peroxide (H2O2), and hydrochloric acid (HCl, 98% v/v) were procured from SD Fine Chemicals Ltd., India. Ethanol was procured from Changshu Hongsheng Fine Chemical Co., Ltd. Methanol was purchased from Central Drug House Pvt., Ltd., India. Bovine serum albumin (BSA), Bradford reagent, potassium chloride (KCl), potassium dihydrogen phosphate (KH2PO4), dipotassium hydrogen phosphate (K2HPO4), disodium hydrogen phosphate (Na2HPO4), tris (hydroxymethyl) aminomethane hydrochloric acid (Tris-HCl), nicotinamide adenine dinucleotide hydrogen (NADH), N, N-dimethylformamide (DMF), nitro blue tetrazolium chloride (NBT) ethylenediamine tetraacetic acid (EDTA), and trichloroacetic acid (TCA) were purchased from HiMedia Pvt. Ltd., India. Acetocarmine was procured from Nice Chemicals Pvt. Ltd., India.

**S2: Synthesis of ZnO QDs and NPs**

**Preparation of ZnO QDs:** 0.22 gof Zinc acetate dihydrate (Zn(OAc)2·2H2O) was added to 100 mL of ethanol under stirring conditions, and the mixture was heated at 75 ± 1 ºC for 30 min for complete dissolution. To this solution, 0.17 g of KOH (dissolved in 8 mL of ethanol) was added dropwise under vigorous stirring. After stirring for 30 min, ZnO QDs were formed as a milky-white suspension, and the mixture was cooled down to 33 ± 1 ºC. Following this, 10 mL of ethanol was added to the mixture at room temperature with constant stirring for 30 min to ensure the uniformity of ZnO QDs formed. ZnO QDs formed were then subjected to washing with absolute ethanol and centrifuged at 12,000 rpm for 15 min. Finally, the ZnO QDs were dried in a hot air oven at 60 ºC for 48 hrs Saber et al. (2025).

**Preparation of ZnO NPs:** 2 gof Zinc acetate dihydrate (Zn(OAc)2·2H2O) was dissolved in 15 mL of distilled water and kept under stirring for 30 min. To the well-mixed solution, 8 g of NaOH (dissolved in 15 mL of distilled water) was added dropwise. After the reaction, a white precipitate was formed, which confirms the formation of ZnO NPs. The resultant ZnO NPs were washed thrice with absolute ethanol and were subjected to drying in a hot air oven at 60 ºC for 48 hrs Al-luhaibi and Sendi. (2022).

**S3: Characterisation of ZnO particles (in the presence and absence of CdSO4)**

For the characterisation of pristine particles and their mixtures, 10 mg/L of ZnO particles and 20 mg/L of Cd were chosen. The surface morphology, shape and elemental composition of pristine ZnO particles and the binary mixture of ZnO and CdSO4 were determined using Field-Emission Scanning Electron microscopy (FE-SEM; Thermo Fisher FEI Quanta 250 FEG) coupled with Energy Dispersive X-ray spectrometer (EDS). The functional imprints of ZnO particles and CdSO4 were analysed using Fourier Transform Infrared Spectroscopy (FT-IR; IR-Spirit Shimadzu, Japan) (400-4000 cm-1). The vibrational modes of the samples were analysed using Raman Spectroscopy (Anton Paar Cora 5001, Austria). In addition, the crystalline nature and phase purity of the samples were analysed by X-ray Diffraction technique (XRD; Bruker D8 Advance, Panalytical X Pert3, Germany, Netherlands) in the 2θ range of 10◦-80◦. The surface charge of the samples was determined using a zeta potential analyser (90 Plus Particle Size Analyser, Brookhaven Instruments Corp., USA). The hydrophilicity/ hydrophobicity of the samples was measured using a goniometer (Model: DMs-401, Kyowa Interface Science Co., Ltd.; software-FAMAS). To determine the hydrophobicity, a minute drop of the liquid sample was placed on the glass side for air drying. When the droplet was completely dried, contact angle measurements were taken using a sessile-drop technique with water [3]. The fluorescence emission spectra of the ZnO particles and their mixtures with CdSO4 were determined using a fluorescence spectrometer (Cary Eclipse fluorescence spectrophotometer, Model – G9800A, Agilent Technologies, USA). Spectra were recorded at the excitation wavelength of 365 nm for ZnO QDs, 325 nm for ZnO NPs, and 360 nm for ZnO bulk with the excitation and emission slits set at 10 nm [4, 5].

**S4: Determination of cell viability**

The cytotoxicity of *A. sativum* root cells was analysed using the Evans blue dye [6]. The roots exposed to ZnO particles and CdSO4 were stained using a 0.25% (w/v) aqueous solution of Evans blue dye for 15 minutes. After staining, the roots were rinsed with distilled water for 30 minutes. To extract the dye from the roots, 4–5 treated roots were placed in 4 mL of DMF for 1 hour at room temperature. The absorbance of the dye in DMF was then measured at 600 nm using a UV–VIS Spectrophotometer (UV 220, Thermofisher Scientific, USA). The percentage of cell death was determined, and cell viability was calculated by subtracting the cell death percentage from 100. The viability of untreated root cells serves as a negative control. Cell death percentage was computed using the formula:

**S5: Accumulation of Zn and Cd by *A. sativum* roots**

0.5g of root samples were washed three times with a 5 mM CaCl2 solution to remove any adhered Zn and Cd on the roots, and then freeze-dried and digested in 5 mL of 70% HNO3 (v/v) at 95 °C for 1 h. Once the mixture has completely cooled to room temperature, 3 ml 30% H2O2 (w/v) is added and then heated at 100 °C for 30 min until the roots are fully digested. Following digestion, the samples were diluted using deionised water before being analysed using Atomic Absorption Spectroscopy (AAS) (Perkin Elmer, United States) [7].

**S6: Determination of mitotic index**

To calculate the mitotic index, the standard acetocarmine technique was followed [8]. After 4 h of treatment, the roots were washed thoroughly with distilled water and the root tips from each treatment were excised and fixed for 12 h in Farmer’s fluid (1:3, glacial acetic acid: ethanol, v/v). The microscopic slide was prepared by hydrolysing the root tips using 1 mol L-1 HCl for 5 min, followed by transfer to a watch glass containing acetocarmine and 1 mol L-1 HCl (9:1, v/v). Slides were intermittently heated for 5-10 min, and covered and kept aside for 15-20 min. The root tips measuring 2-3 mm were then cut and mounted on a glass slide. The excess or unbound stain was removed by placing a drop of 45% glacial acetic acid (GAA) on the root tips, and the roots were gently squashed by placing a coverslip over them. The prepared slides were then observed under an optical microscope (Leika DM2500, USA) at 40X magnification to visualise the cytological alterations. Based on the number of dividing cells per 1,000 observed cells, the mitotic index (MI) and phase index (PI) were calculated [9]. The percentage of MI and PI was calculated using the formula:

Where, MI (%) is the percentage of mitotic index, Nm is the number of cells undergoing mitosis, Nt is the total number of cells observed, PI (%) is the percentage of phase index, Np is the number of cells in each phase of mitosis.

**S7: Nile red staining for suberin visualisation**

After 120 h of interaction, the free-hand root longitudinal sections from each treatment were stained with freshly prepared Nile red (0.01%, w/v) dissolved in 85% lactic acid saturated with chloral hydrate for 1 h at 70 ◦C. The sections were rinsed briefly with water three times, mounted in 50% glycerol on slides, and observed under a fluorescence microscope (Zeiss Axiolab 5, equipped with Axiocam, China). The excitation and detection windows were set at 561nm and 600-630 nm during imaging [10].

**S8: Evaluation of oxidative stress: Total ROS and lipid peroxidation assessment**

After 120 h of treatment, 100 mg of roots from each treatment were homogenised in a chilled mortar and pestle using 1X PBS, and the mixture was centrifuged at 10,000 rpm for 10 min. 2′,7′-dichloro-fluorescein diacetate (DCFH-DA) (100 mol L-1) was added to the obtained supernatant, and the samples were kept in a dark condition for 30 min. The fluorescence of the samples was measured using a Fluorescence Spectrophotometer (Cary Eclipse fluorescence spectrophotometer, Model G9800A, Agilent Technologies, USA) with excitation and emission wavelengths set at 485 nm and 530 nm, respectively. The obtained results were compared to the control [11].

To estimate the amount of malondialdehyde (MDA) produced upon lipid peroxidation, 1.5 g of fresh root samples from both treated and untreated bulbs were homogenised using 3 mL of reaction mixture containing trichloroacetic acid (TCA, 20% w/v) and thiobarbituric acid (TBA, 0.5% w/v). After homogenization, the mixture was heated at 95 ◦C for 30 min, allowed to cool, and then centrifuged for 10 min at 12,000 rpm. The supernatant was collected and their absorbance was measured at 600 and 532 nm using a plate reader (BIO-RAD, xMark microplate spectrophotometer, Japan). The non-specific absorbance at 600 nm was subtracted from the absorbance at 532 nm. The amount of MDA formed by the TBA reaction in the treated samples indicates the degree of lipid peroxidation and is expressed relative to the control [12].

**S9: Estimation of SOD and CAT activity**

0.3 g of *A. sativum* roots after 120 h of treatment with ZnO particles and their mixture with CdSO4 were homogenised in 1.5 mL of chilled extraction buffer containing 50 mM Tris-HCl (pH 7.8), 1 mM ethylenediamine tetraacetic acid (EDTA) and 1.5 % (w/w) polyvinylpyrrolidone (PVP). The finely homogenised mixture was then centrifuged at 15,000 g for 20 min at 4◦C and the obtained supernatant was stored at 4 ◦C for the determination of superoxide dismutase (SOD) and catalase (CAT) activities.

SOD activity was determined by the inhibition of nitroblue tetrazolium reduction (NBT). 20 μL of plant extract was added to 2.98 mL of the reaction mixture (consisting of 50 mM phosphate buffer (pH 7.8), 10 mM methionine, 0.01 mM EDTA, 1.13 mM NBT, 0.6 mM riboflavin) and was kept at 4000 lx irradiance for 15-20 min. After the reaction was terminated in the dark, the absorbance was measured at 560 nm. One SOD unit corresponds to the amount of enzyme that causes 50% inhibition of the photochemical reduction of NBT [13].

To determine the CAT activity of the pre-extracted root samples, 0.1 mL of enzyme extract was added to the reaction mixture containing 0.4 mL of 200 mM H2O2 and 1 mL of 100 mM potassium phosphate buffer (pH 7.0). The CAT activity was determined by monitoring the depletion of H2O2 at 240 nm for 3 min. The results were plotted with respect to the control [14].

**S10: Determination of chlorophyll and carotenoid Levels**

Chlorophyll and carotenoid content were determined by following the protocol of Dey et al. (2019). Finely chopped shoot tissues weighing 0.2g were incubated overnight with 80% acetone (2 mL). The absorbance of the resulting extract was measured at three different wavelengths (470 nm, 646.8 nm, and 663.2 nm) using a UV spectrophotometer (Thermo Fisher Scientific Inc., USA). The amount of chlorophyll (Chl) a, b, total chlorophyll (a+b), and total carotenoid Car(x + c) were calculated using the following equations (1, 2, 3, and 4, respectively)

Chla = 12.25 A663.2–2.79 A646.8 (1)

Chlb= 21.5 A646.8–5.1 A663.2 (2)

Chl(a+b) = 7.15 A663.2 + 18.71 A646.8 (3)

Car(x+c) = (1000 A470 – 1.82 Chla −85.02 Chlb)/198 (4

**S11: Determination of Fv/Fm and ETR**

The fluorescence was recorded using a pulse amplitude-modulated (PAM) fluorometer (H. Walz, Effeltrich, Germany, model PAM 101–103). Before recording the fluorescence signal, the leaves were dark-adapted for 30 min, and the measurements were taken on the same leaf blade as used for measuring photosynthetic parameters. The minimal fluorescence (F0) level was measured at an instrument frequency of 1.6 kHz, and the measuring beam was set at 0.02 μmol photons m− 2 s− 1. The maximal fluorescence (Fm) was determined after a 0.8 s saturation pulse at 2500 μmol photons m− 2 s− 1 PFD on the dark-adapted leaves. The actinic light illumination (250 μmol photons m− 2 s− 1) was provided by a second Schott lamp KL 150, and the maximum quantum yield of PSII, Fv/Fm and ETR values were recorded [16].

**S12:** **Estimation of soluble sugars and protein levels**

After 120 h of interaction, roots (1g) were crushed using PBS (pH 7.4) in a chilled mortar and pestle, then centrifuged at 10,000 rpm for 10 minutes. The resulting supernatant was stored and used to measure carbohydrate and protein content. The assays were performed in triplicate as described by Krishnaraj et al. (2012).

To measure carbohydrate, 100 µl of the liquid was also diluted to 1 ml with PBS, mixed with 1 ml of 5% phenol (aqueous w/v), and 5 ml of concentrated sulfuric acid. The mixture was then incubated at 37◦C for 10 minutes, and the absorbance was read at 490 nm using a UV-VIS Spectrophotometer (Thermo Fisher Scientific Inc., USA). The amount of carbohydrate present was quantified using a standard graph prepared using D-glucose in the range of 10–100 mg L-1.

To measure protein content, 50 µl of the liquid was diluted to 1 ml with PBS, mixed with 5 ml of Bradford reagent, and the absorbance was read at 595 nm using a UV-VIS Spectrophotometer (Thermo Fisher Scientific Inc., USA) against a reagent blank. Protein content was estimated using bovine serum albumin (BSA) as a standard, ranging from 10 mg L-1 to 100 mg L-1 [17].

**FIGURES**


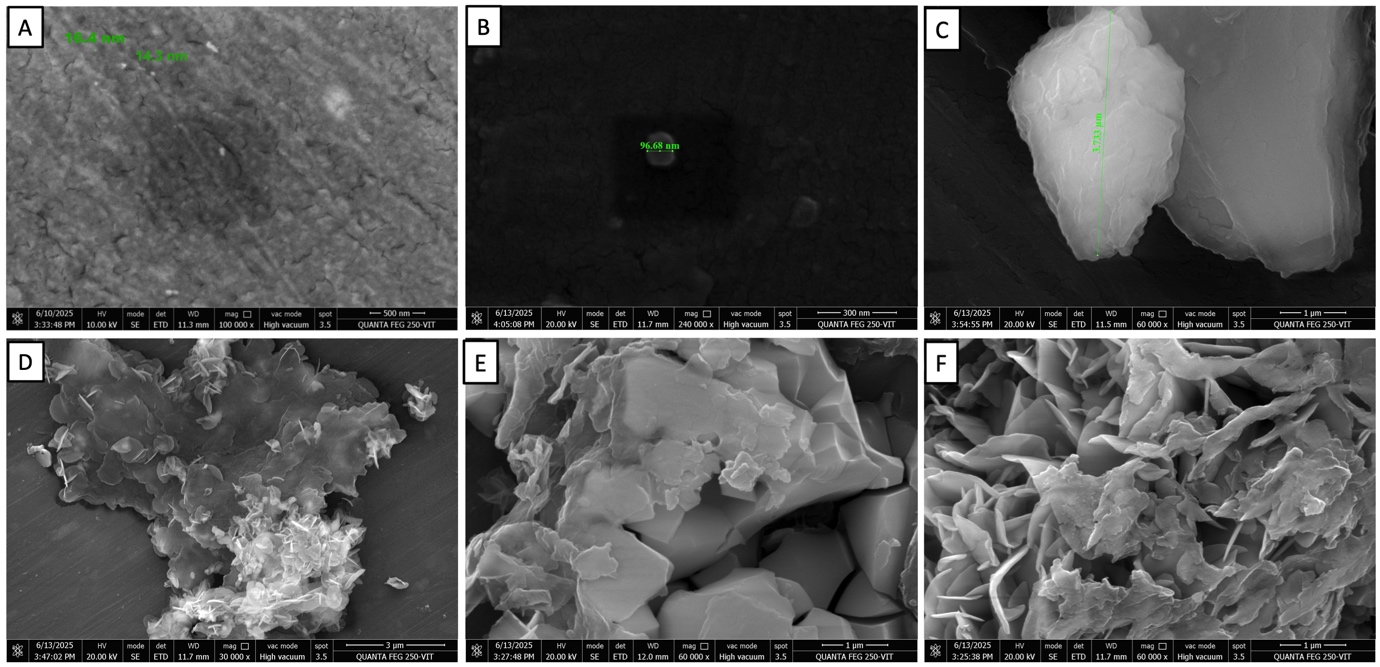


**S1.** FESEM images of pristine ZnO A) QDs, B) NPs, and C) BPs and their mixtures with CdSO4 D) QDs + Cd, E) NPs + Cd, and F) BPs + Cd


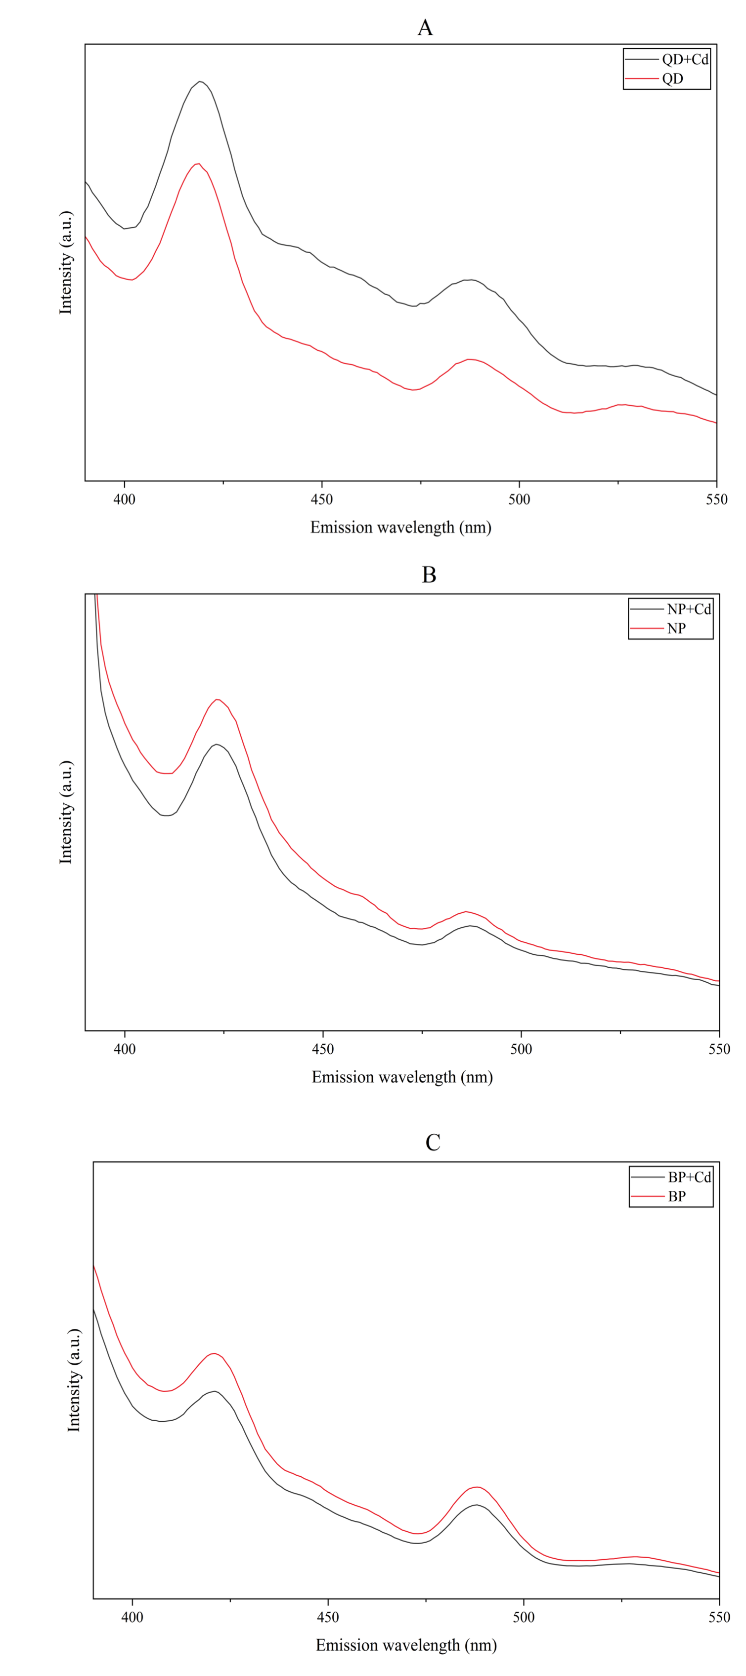


**S2**. Fluorescence spectra of ZnO A) QDs and QDs + Cd, B) NPs and NPs + Cd, and C) BPs and BPs + Cd


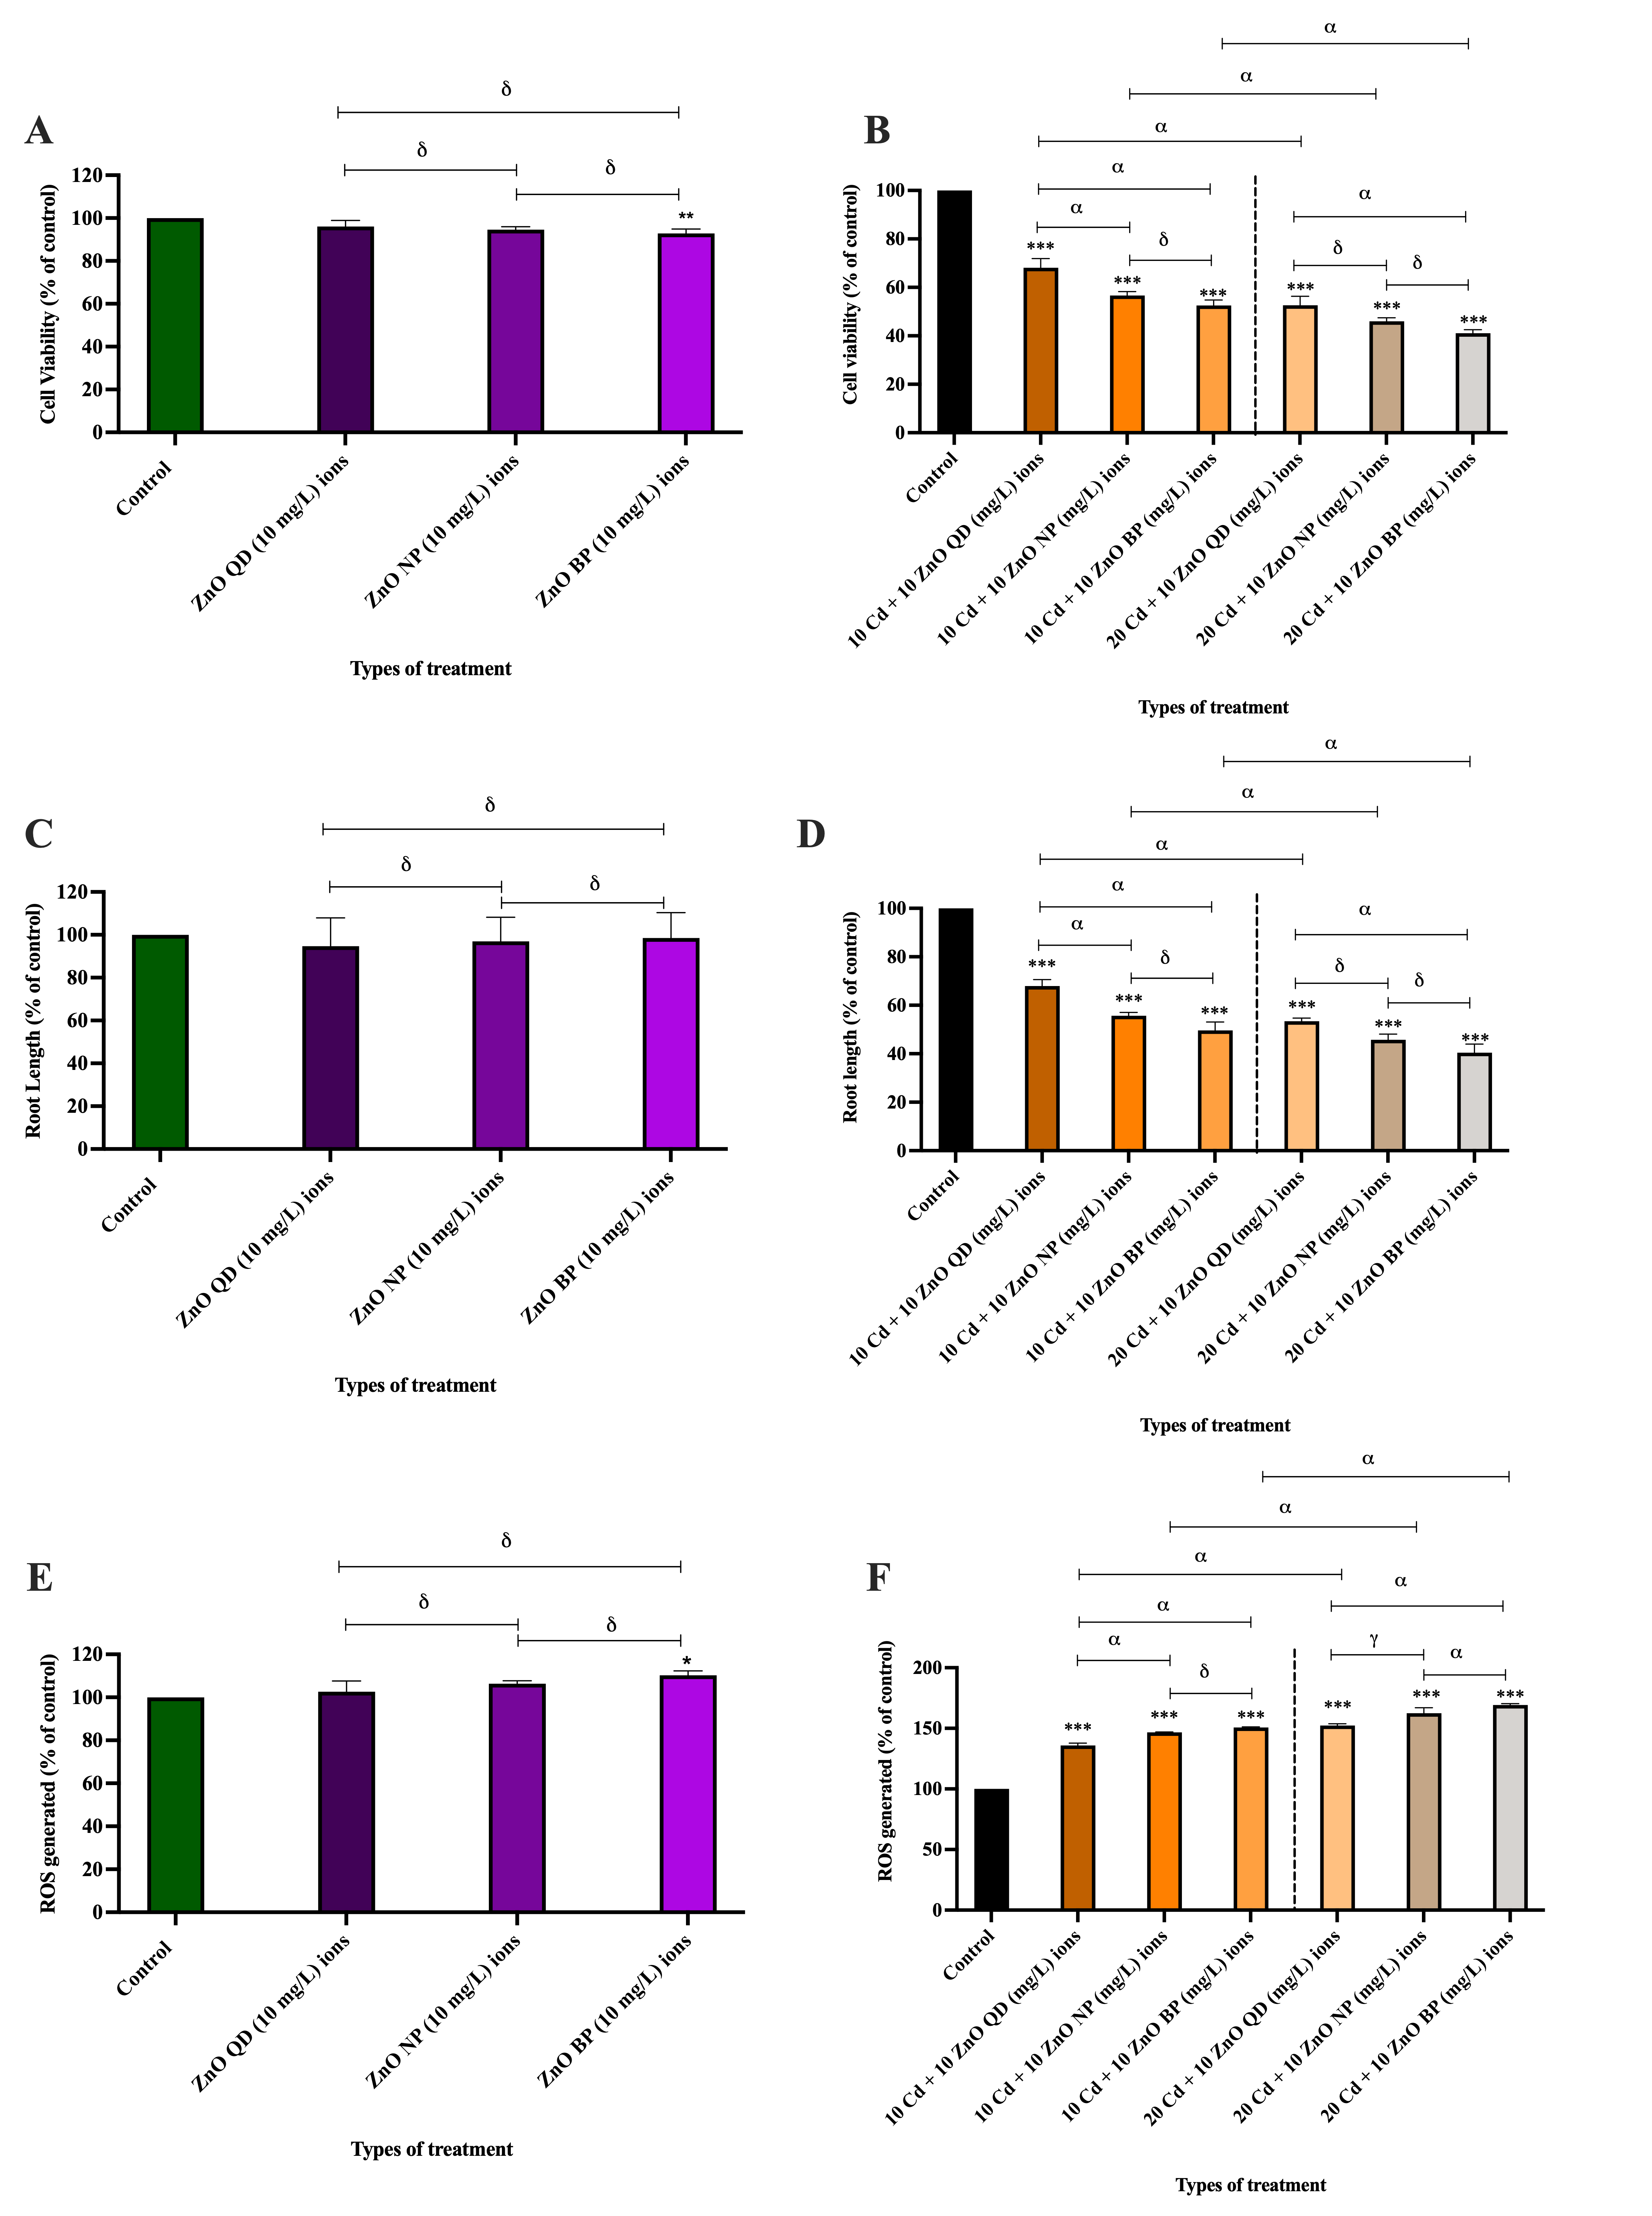


**S3:** Alterations in A) Cell viability of *A. sativum* root cells upon exposure to ions leached from pristine ZnO particles and B) ions leached from the binary mixtures of ZnO particles and Cd, C) Root length of *A. sativum* root cells upon exposure to ions leached from pristine ZnO particles and D) ions leached from the binary mixtures of ZnO particles and Cd, E) ROS produced in *A. sativum* root cells upon exposure to ions leached from pristine ZnO particles and F) ions leached from the binary mixtures of ZnO particles and Cd. All the bars represent mean ± SD with n=3. Significant differences between the control setup and the different treatments of ZnO particles and Cd + ZnO particles are marked with ‘*’ (p< 0.05),‘**’ (p < 0.01), ‘***’ (p < 0.001). ‘α, γ, and δ’ signifies the notable difference between the treatment groups (α = p < 0.001, γ = p < 0.01, and δ = p > 0.05).


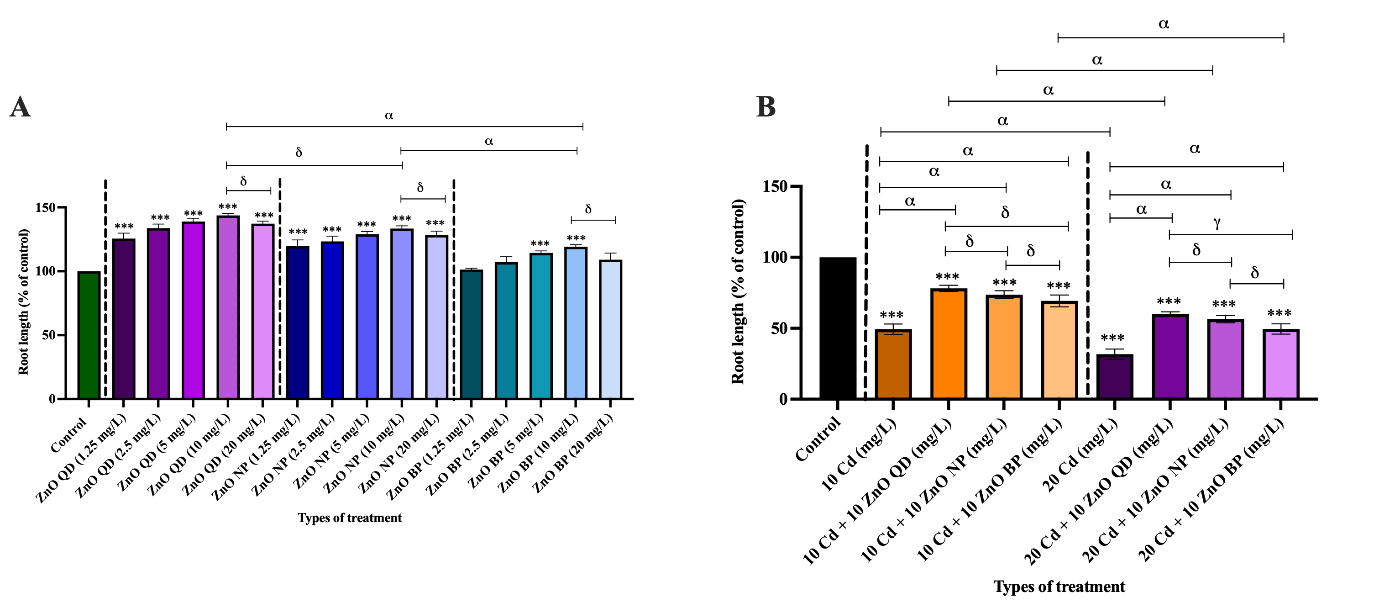


**S4:** Root length of *A. sativum* exposed to A) pristine ZnO particles and B) binary mixtures of ZnO and Cd. All the bars represent mean ± SD with n=3. Significant differences between the control setup and the different treatments of ZnO particles and Cd + ZnO particles are marked with ‘*’ (p < 0.05),‘**’ (p < 0.01), ‘***’ (p < 0.001). ‘α, γ, and δ’ signifies the notable difference between the treatment groups (α = p < 0.001, γ = p < 0.01, and δ = p > 0.05).

**
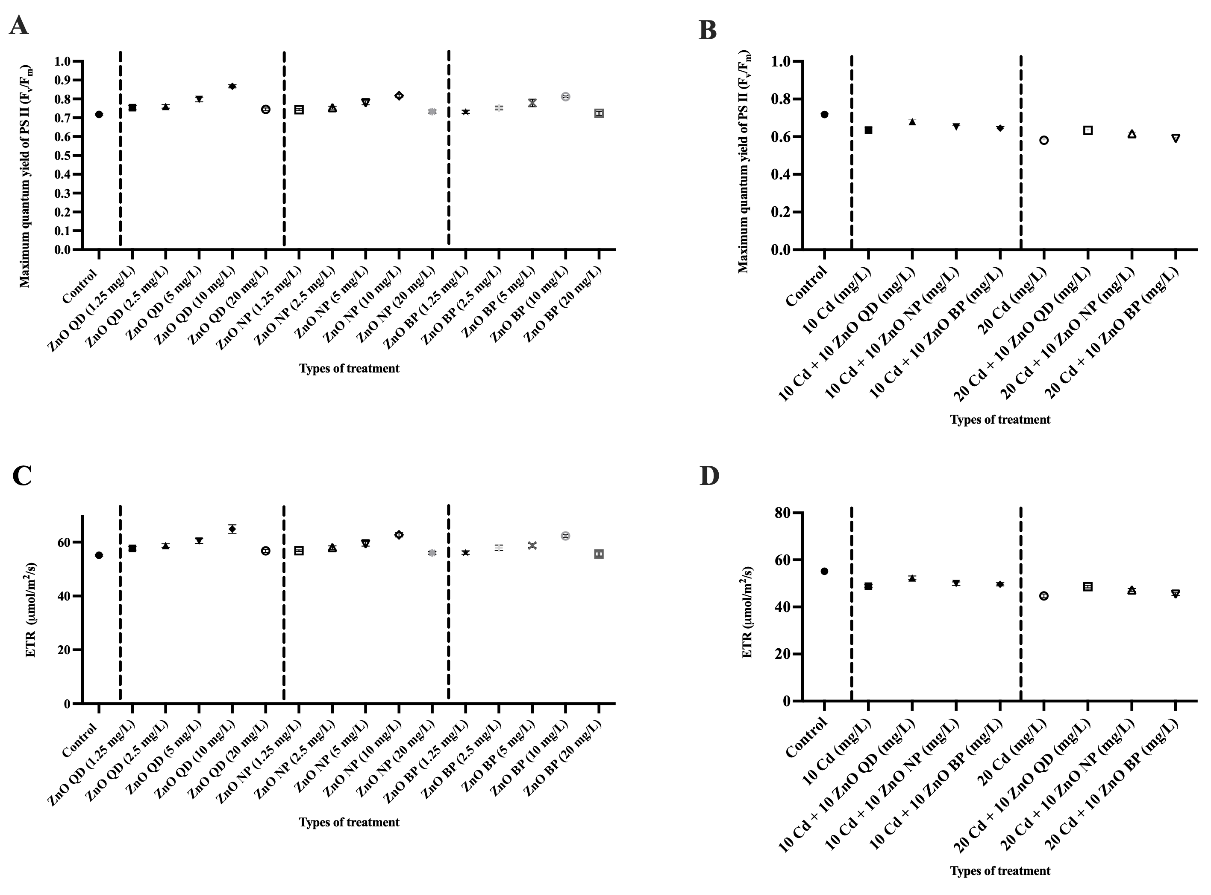
**

**S5:** Maximum quantum yield of photosystem II **(**Y(II)) of *A. sativum* leaves exposed to A) pristine ZnO particles, B) binary mixtures of Cd + ZnO, and Electron transport rate (ETR) of *A. sativum* leaves exposed to C) pristine ZnO particles, D) binary mixtures of Cd + ZnO.


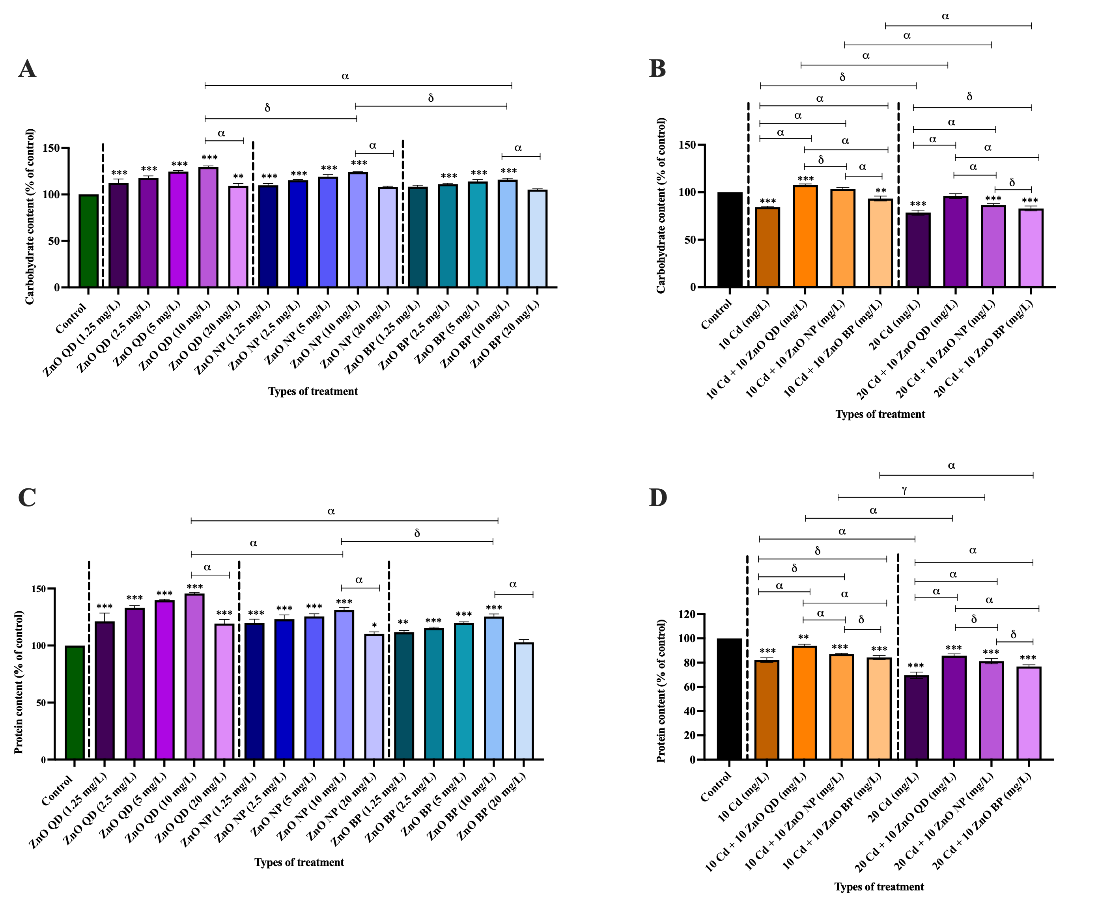


**S6:** Carbohydrate content of *A. sativum* root cells exposed to A) pristine ZnO particles B) binary mixtures of ZnO particles and Cd and protein content of *A. sativum* root cells exposed to C) pristine ZnO particles D) binary mixtures of ZnO particles and Cd. All the bars represent mean ± SD with n=3. Significant differences between the control setup and the different treatments of ZnO particles and Cd + ZnO particles are marked with ‘*’ (p< 0.05),‘**’ (p < 0.01), ‘***’ (p < 0.001). ‘α, γ, and δ’ signifies the notable difference between the treatment groups (α = p < 0.001, γ = p < 0.01, and δ = p > 0.05).


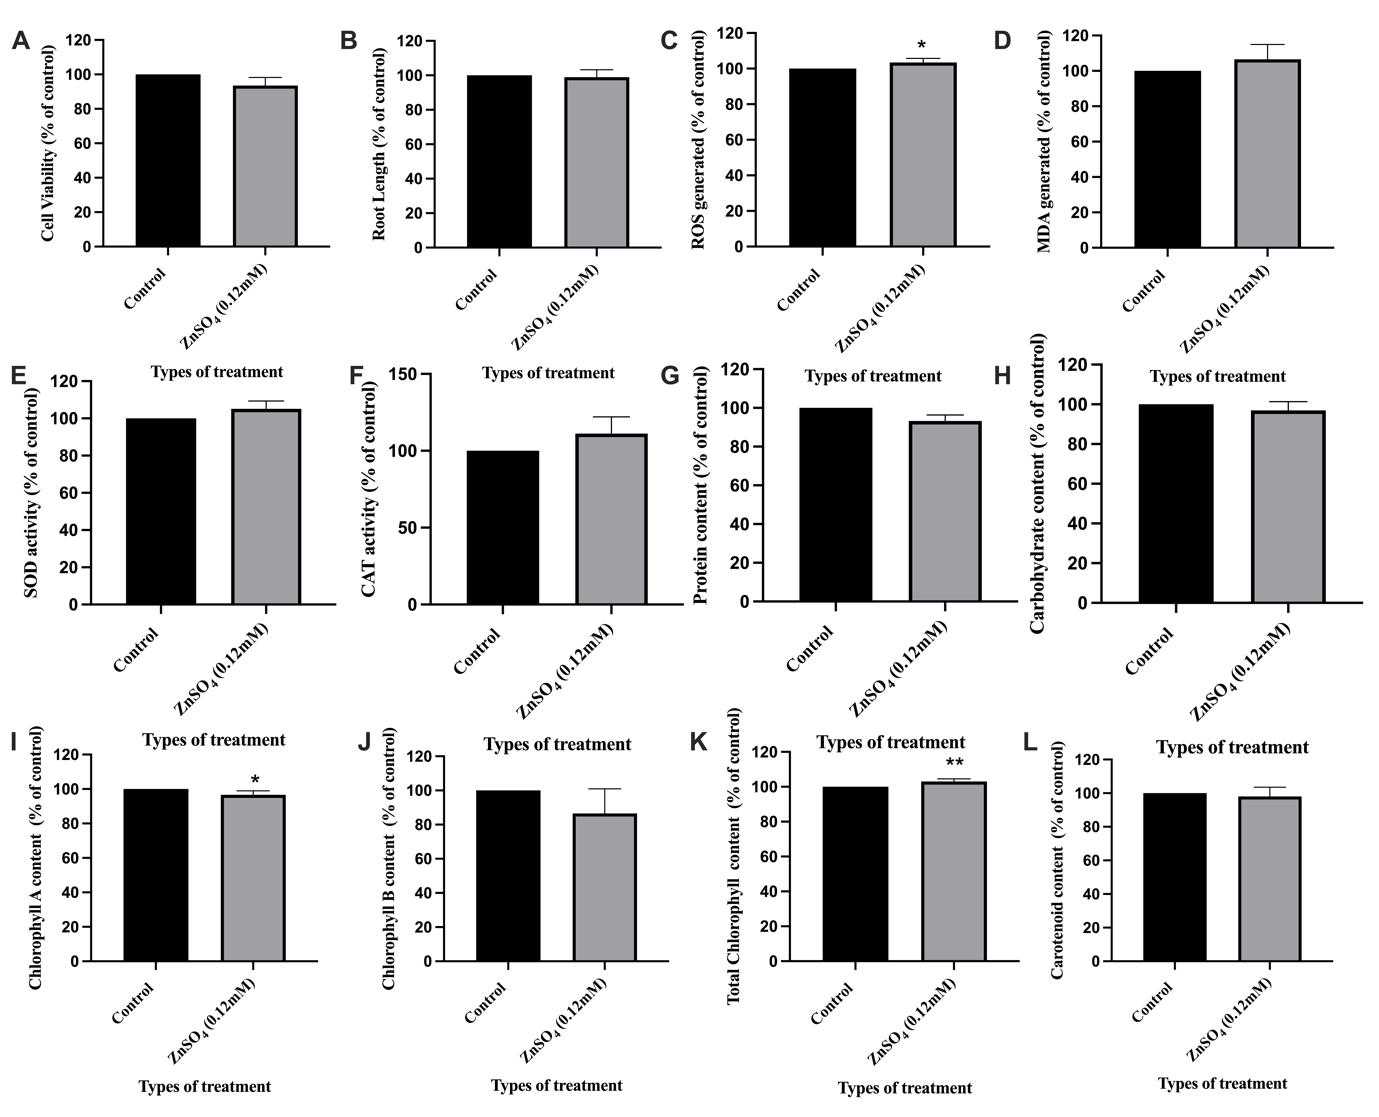


**S7**. Influence of ZnSO4.7H2O (ionic control) on A) Cell viability, B) Root length, C) ROS generation, D) MDA generation, E) SOD activity, F) CAT activity, G) Protein content, H) carbohydrate content, I) Chlorophyll A content, J) Chlorophyll B content, K) Total Chlorophyll content, L) Carotenoid content of *A. sativum*. All the bars represent mean ± SD with n=3. Significant differences between the control and ionic control are marked with ‘*’ (p< 0.05),‘**’ (p < 0.01).

**
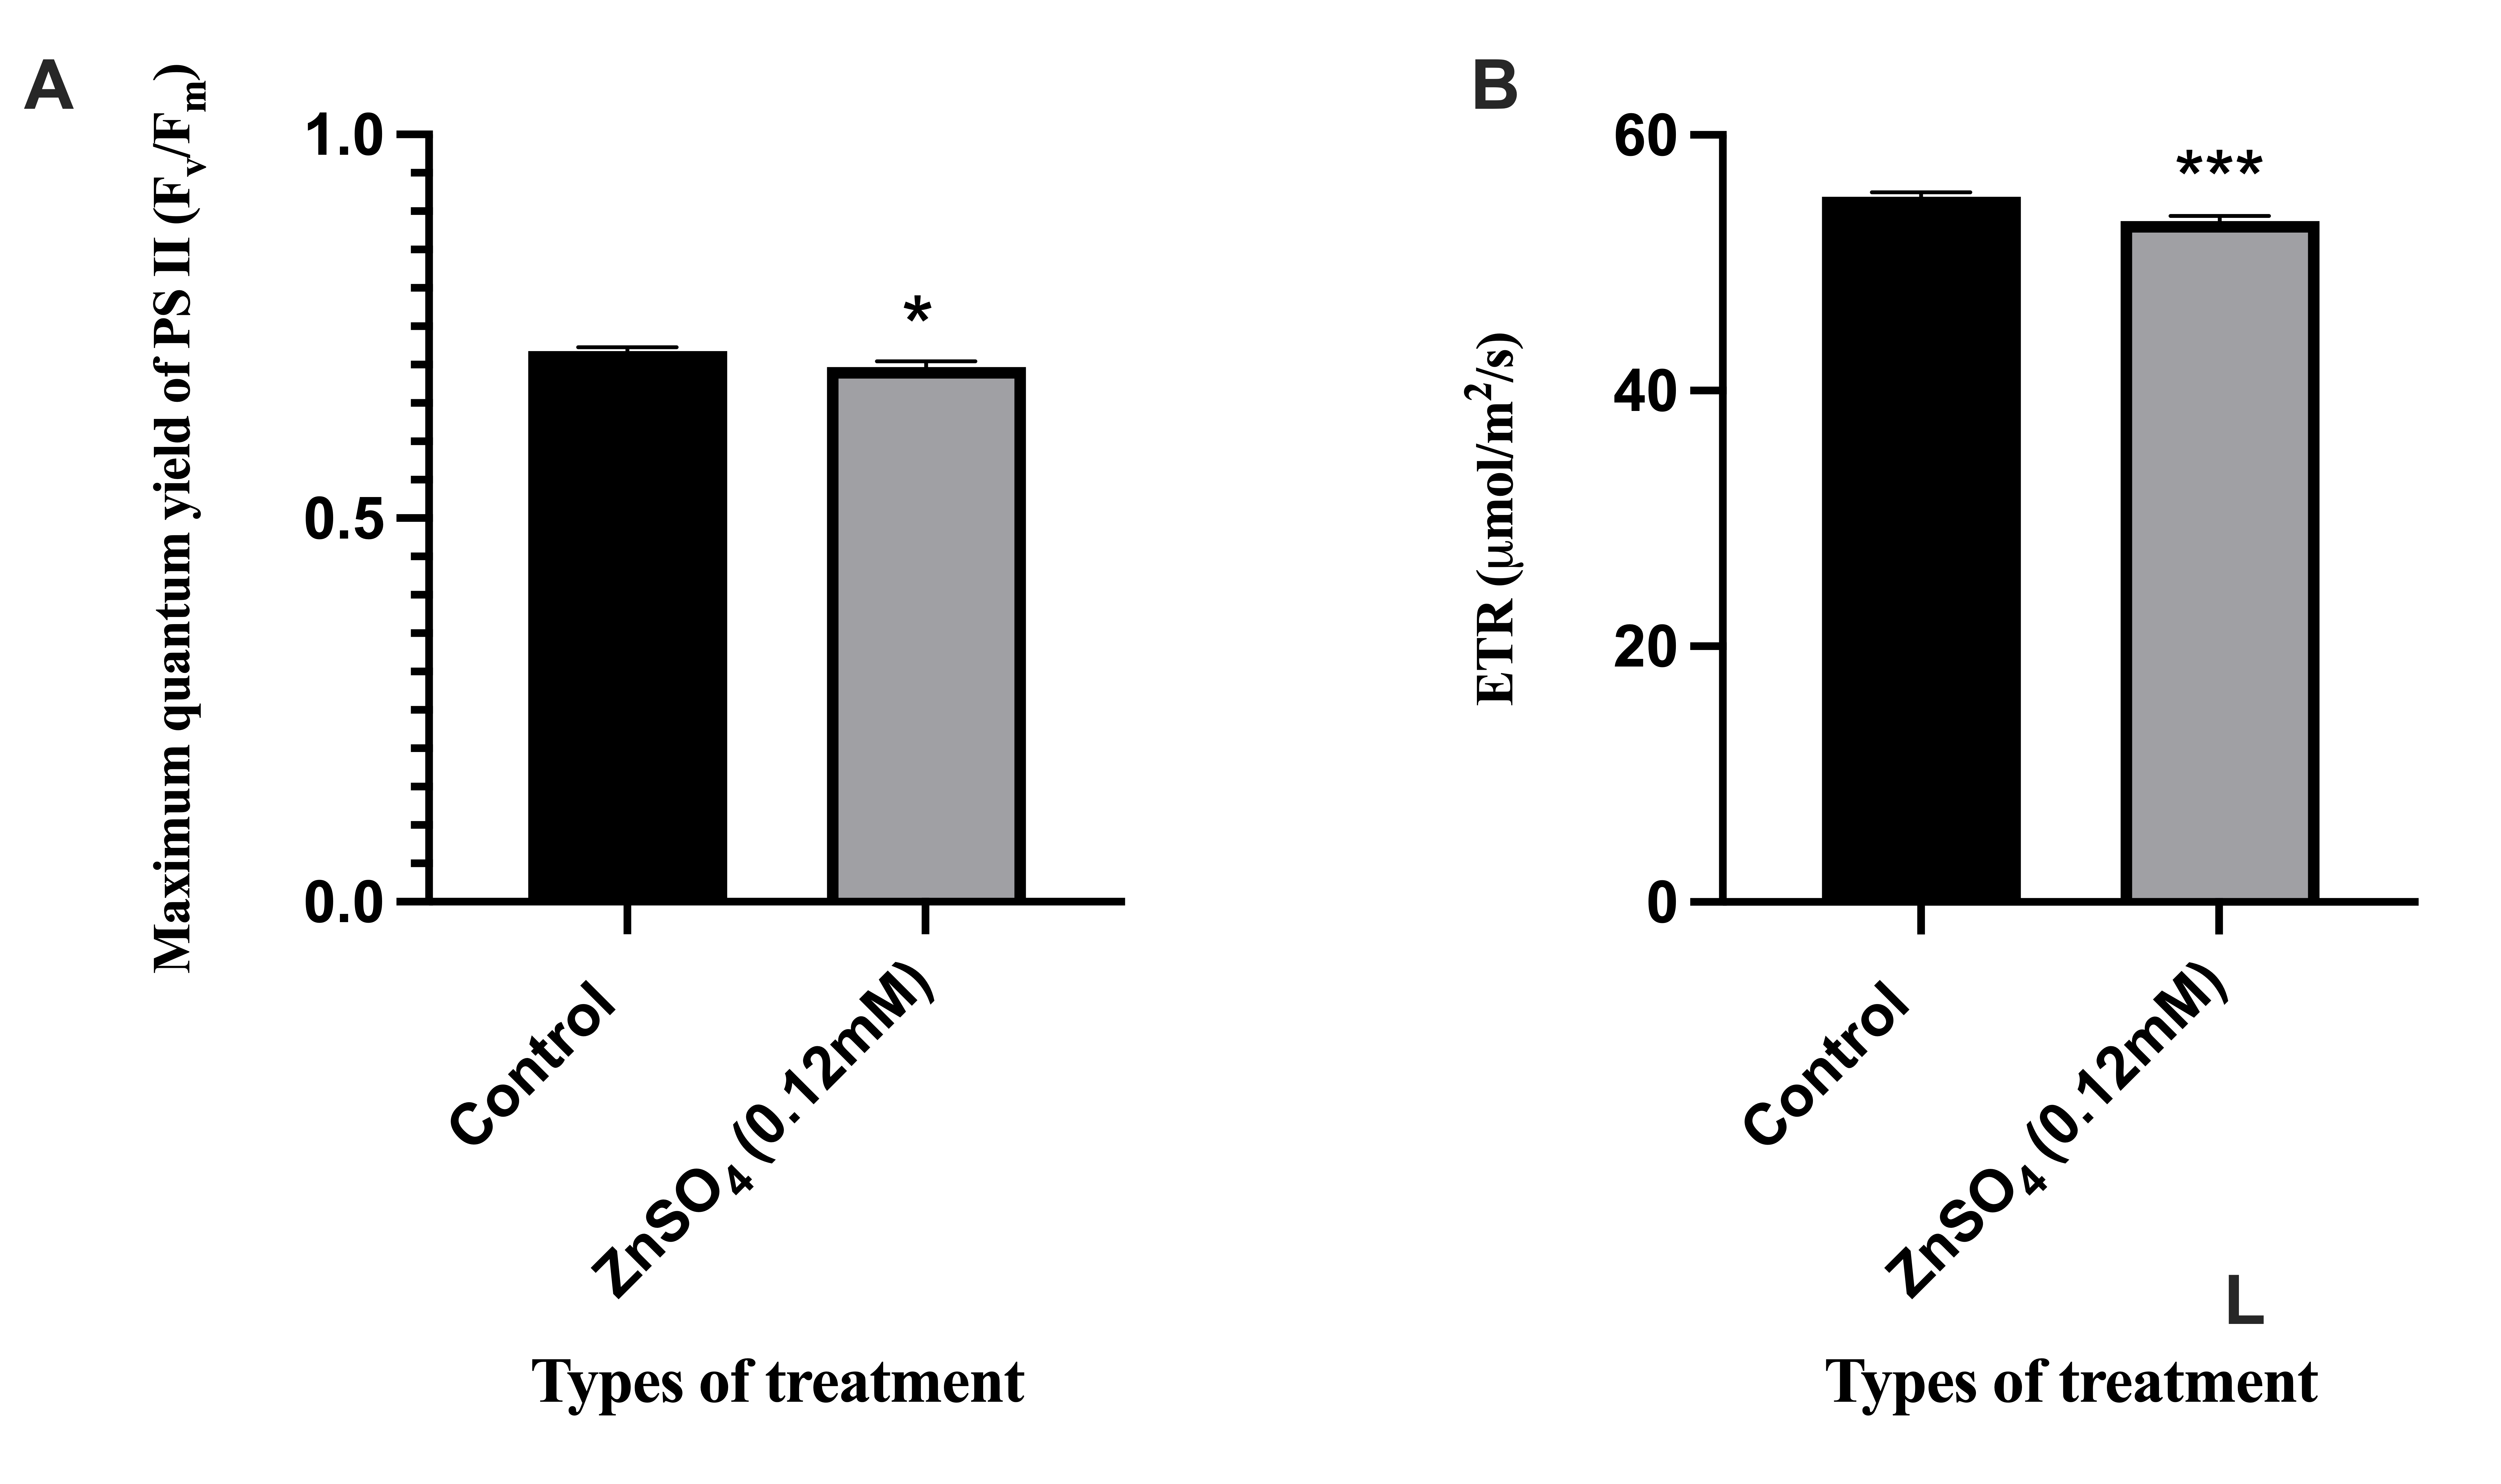
**

**S8.** Influence of ZnSO4.7H2O (ionic control) on A) Maximum quantum yield of photosystem II **(**Y(II)), B) Electron transport rate (ETR) of *A. sativum* leaves. All the bars represent mean ± SD with n=3. Significant differences between the control and ionic control are marked with ‘*’ (p< 0.05),‘***’ (p < 0.001).

**Tables**

**S1: Hoagland nutrient medium composition**

| **REAGENTS** | **STOCK (C1)** | **WORKING (C2)** | **REQUIRED VOLUME (V1) (ml / L)** |
| --- | --- | --- | --- |
| Ca(NO3)2 | 2M | 2.0mM | 1.00 |
| KH2PO4 | 1M | 0.5 mM | 0.50 |
| K2SO4 | 1M | 0.7mM | 0.75 |
| KCl | 1M | 0.01mM | 0.10 |
| MgSO4 | 1M | 0.65 mM | 0.65 |
| MnSO4.2H2O | 9.67 mM | 1.0 μM | 0.10 |
| ZnSO4 | 7.60 mM | 1.00 μM | 1.31 |
| CuSO4 | 0.14 mM | 0.20 μM | 1.42 |
| H3BO3 | 46 mM | 2.00 μM | 0.04 |
| (NH4)6MoO24 | 0.05 mM | 0.02 μM | 0.40 |
| FeEDTA | 666 mM | 20.0 μM | 0.03 |

**S2:** Zeta potential values of pristine ZnO particles and their mixtures with Cd at 0 h and 120 h

| **Types of treatments** | **0 h** | | **120 h** | | **Mathematical significance** | | |
| --- | --- | --- | --- | --- | --- | --- | --- |
| **0 vs 120 h** | **ZnO Pristine vs ZnO+Cd** | |
| **0 h** | **120 h** |
| Mean (mV) | SD | Mean (mV) | SD |
| Cd (10 mg/L) | -7.75 | 0.97 | -4.54 | 0.85 | * | _ | _ |
| Cd (20 mg/L) | -9.57 | 0.88 | -5.90 | 1.62 | * |
| ZnO QD (Pristine) | -16.05 | 0.83 | -24.11 | 1.92 | *** |
| ZnO NP (Pristine) | -15.21 | 0.60 | -22.41 | 0.98 | *** |
| ZnO BP (Pristine) | -13.62 | 0.49 | -15.85 | 1.06 | * |
| ZnO QD + Cd (10 mg/L) | -15.93 | 1.80 | -22.11 | 3.69 | ns | ns | ns |
| ZnO QD + Cd (20 mg/L) | -12.10 | 1.55 | -20.09 | 2.35 | ** | * | ns |
| ZnO NP + Cd (10 mg/L) | -10.89 | 0.63 | -19.88 | 3.20 | ** | *** | ns |
| ZnO NP + Cd (20 mg/L) | -10.28 | 3.05 | -18.44 | 1.27 | * | * | ** |
| ZnO BP + Cd (10 mg/L) | -8.31 | 1.68 | -14.97 | 1.88 | * | *** | ns |
| ZnO BP + Cd (20 mg/L) | -8.14 | 1.80 | -12.62 | 2.30 | ns | *** | ns |

**S3.** Contact angle values of pristine ZnO particles and their mixtures with CdSO4

| **Types of treatments** | **0 h** | | **120 h** | | **Mathematical significance** | | |
| --- | --- | --- | --- | --- | --- | --- | --- |
| **0 vs 120 h** | **ZnO Pristine vs ZnO + Cd** | |
| **0 h** | **120 h** |
| **MEAN (˚)** | **SD** | **MEAN (˚)** | **SD** |
| **Cd (10 mg/L)** | 34.93 | 2.06 | 31.20 | 3.28 | ns | - | - |
| **Cd (20 mg/L)** | 38.53 | 0.90 | 36.10 | 3.51 | ns |
| **ZnO QD (Pristine)** | 54.53 | 2.99 | 56.00 | 2.38 | ns |
| **ZnO NP (Pristine)** | 44.60 | 2.84 | 48.03 | 1.90 | ns |
| **ZnO BP (Pristine)** | 41.23 | 3.69 | 45.83 | 5.49 | ns |
| **ZnO QD + Cd (10 mg/L)** | 52.20 | 5.37 | 54.47 | 1.27 | ns | ns | ns |
| **ZnO QD + Cd (20 mg/L)** | 45.47 | 4.17 | 51.37 | 5.62 | ns | ns | ns |
| **ZnO NP + Cd (10 mg/L)** | 43.13 | 2.46 | 46.50 | 0.50 | ns | ns | ns |
| **ZnO NP + Cd (20 mg/L)** | 42.23 | 3.99 | 43.07 | 2.51 | ns | ns | ns |
| **ZnO BP + Cd (10 mg/L)** | 35.23 | 3.25 | 39.43 | 1.12 | ns | ns | ns |
| **ZnO BP + Cd (20 mg/L)** | 35.03 | 4.48 | 37.40 | 3.80 | ns | ns | ns |

**S4. Nominal concentrations, Leaching and accumulation of Zn and Cd**

| **Types of contaminant** | **Zn** | | | | | | **Cd** | | | |
| --- | --- | --- | --- | --- | --- | --- | --- | --- | --- | --- |
| **0 h nominal concentrations (mg/L)** | | **120 h accumulation in plant root**  **(mg/L)** | | **Leaching of Zn2+ at 120 h (mg/L)** | | **0 h nominal concentration (mg/L)** | | **120 h accumulation in plant root**  **(mg/L)** | |
| **Mean** | **SD** | **Mean** | **SD** | **Mean** | **SD** | **Mean** | **SD** | **Mean** | **SD** |
| **10 mg/L QD** | 7.932 | 0.025 | 1.561 | 0.114 | 0.917 | 0.008 | _ | _ | _ | _ |
| **10 mg/L NP** | 7.399 | 0.754 | 1.210 | 0.019 | 0.720 | 0.013 | _ | _ | _ | _ |
| **10 mg/L BP** | 6.865 | 0.077 | 0.964 | 0.050 | 0.646 | 0.062 | _ | _ | _ | _ |
| **10 mg/L Cd** | _ | _ | _ | _ | _ | _ | 3.668 | 0.127 | 0.715 | 0.009 |
| **20 mg/L Cd** | _ | _ | _ | _ | _ | _ | 4.665 | 0.037 | 0.742 | 0.025 |
| **10 mg/L Cd + 10 mg/L QD** | 4.658 | 0.012 | 0.717 | 0.006 | 0.121 | 0.003 | 3.277 | 0.005 | 0.306 | 0.001 |
| **10 mg/L Cd + 10 mg/L NP** | 4.578 | 0.012 | 0.638 | 0.005 | 0.105 | 0.004 | 3.385 | 0.037 | 0.319 | 0.016 |
| **10 mg/L Cd + 10 mg/L BP** | 4.278 | 0.031 | 0.609 | 0.009 | 0.099 | 0.001 | 3.578 | 0.017 | 0.338 | 0.001 |
| **20 mg/L Cd + 10 mg/L QD** | 4.618 | 0.057 | 0.213 | 0.035 | 0.085 | 0.005 | 3.758 | 0.051 | 0.372 | 0.019 |
| **20 mg/L Cd + 10 mg/L NP** | 3.513 | 0.093 | 0.164 | 0.008 | 0.077 | 0.004 | 4.341 | 0.025 | 0.631 | 0.006 |
| **20 mg/L Cd + 10 mg/L BP** | 3.064 | 0.062 | 0.124 | 0.001 | 0.065 | 0.001 | 4.503 | 0.229 | 0.674 | 0.032 |

**REFERENCES**

1. Saber G, Badie G, El‐Dissouky A, et al (2025) 3‐Aminopropyl Triethoxysilane Capped ZnO Quantum Dots for Acrylamide Detection. Adv Quantum Technol 8:2300154

2. Al-luhaibi AA, Sendi RK (2022) Synthesis, potential of hydrogen activity, biological and chemical stability of zinc oxide nanoparticle preparation by sol–gel: a review. J Radiat Res Appl Sci 15:238–254

3. Drelich J (2013) Guidelines to measurements of reproducible contact angles using a sessile-drop technique. Surf Innov 1:248–254

4. Estrada-Urbina J, Cruz-Alonso A, Santander-González M, et al (2018) Nanoscale zinc oxide particles for improving the physiological and sanitary quality of a Mexican landrace of red maize. Nanomaterials 8:247

5. Wang Q, Xu G, Liu G, et al (2025) Water-dispersible, fluorescent color-tunable zinc oxide quantum dot preparation for anti-counterfeiting. Ceram Int 51:13625–13633

6. Ghosh M, Bhadra S, Adegoke A, et al (2015) MWCNT uptake in Allium cepa root cells induces cytotoxic and genotoxic responses and results in DNA hyper-methylation. Mutation Research/Fundamental and Molecular Mechanisms of Mutagenesis 774:49–58

7. Rossi L, Zhang W, Schwab AP, Ma X (2017) Uptake, Accumulation, and in Planta Distribution of Coexisting Cerium Oxide Nanoparticles and Cadmium in Glycine max (L.) Merr. Environ Sci Technol 51:12815–12824. https://doi.org/10.1021/acs.est.7b03363

8. Mangalampalli B, Dumala N, Grover P (2018) Allium cepa root tip assay in assessment of toxicity of magnesium oxide nanoparticles and microparticles. Journal of Environmental Sciences 66:125–137

9. Fiskesjo G (1997) Allium test for screening chemicals; evaluation of cytological parameters. Plants for environmental studies 11:307–333

10. Waduwara CI, Walcott SE, Peterson CA (2008) Suberin lamellae of the onion root endodermis: their pattern of development and continuity. Botany 86:623–632

11. Pakrashi S, Jain N, Dalai S, et al (2014) In vivo genotoxicity assessment of titanium dioxide nanoparticles by Allium cepa root tip assay at high exposure concentrations. PLoS One 9:e87789

12. Kumar D, Dhankher OP, Tripathi RD, Seth CS (2023) Titanium dioxide nanoparticles potentially regulate the mechanism (s) for photosynthetic attributes, genotoxicity, antioxidants defense machinery, and phytochelatins synthesis in relation to hexavalent chromium toxicity in Helianthus annuus L. J Hazard Mater 454:131418

13. Zhang JJ, Lu YC, Zhang JJ, et al (2014) Accumulation and toxicological response of atrazine in rice crops. Ecotoxicol Environ Saf 102:105–112

14. Aebi H (1974) Catalase. Methods of Enzymatic Analysis, 673–684

15. Dey S, Kundu R, Gopal G, et al (2019) Enhancement of nitrogen assimilation and photosynthetic efficiency by novel iron pulsing technique in Oryza sativa L. var Pankaj. Plant Physiology and Biochemistry 144:207–221

16. Elshoky HA, Yotsova E, Farghali MA, et al (2021) Impact of foliar spray of zinc oxide nanoparticles on the photosynthesis of Pisum sativum L. under salt stress. Plant Physiology and Biochemistry 167:607–618

17. Krishnaraj C, Jagan EG, Ramachandran R, et al (2012) Effect of biologically synthesized silver nanoparticles on Bacopa monnieri (Linn.) Wettst. plant growth metabolism. Process biochemistry 47:651–658
